# Supplementary material
Source: Springer Nature journal article supplement (https://www.springermedizin.de/resource/supplementary/40248_2013_68_MOESM1_ESM.pdf/9686042)

# Global Average Temperature and Carbon Dioxide Concentrations, 1880 - 2004

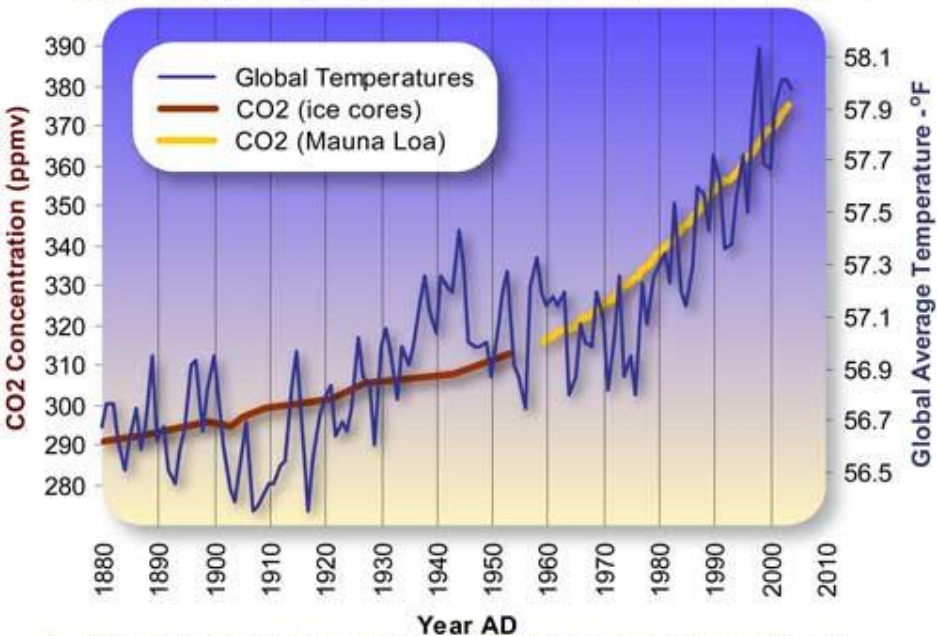

Data Source Temperature: [ftp://ftp.ncdc.noaa.gov/pub/data/anomalies/annual\\_land\\_and\\_ocean.ts](ftp://ftp.ncdc.noaa.gov/pub/data/anomalies/annual_land_and_ocean.ts)

Data Source CO2 (Siple Ice Cores): <http://cdiac.esd.ornl.gov/ftp/trends/co2/siple2.013>

Data Source CO2 (Mauna Loa): <http://cdiac.esd.ornl.gov/ftp/trends/co2/maunaloa.co2>

Graphic Design: Michael Ernst, The Woods Hole Research Center

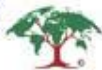

Supplement: MOESM1 [file 9686042]
